# Supplementary material for: Modulation of Transcription Profile Induced by Antiproliferative Thiosemicarbazone Metal Complexes in U937 Cancer Cells
Source: MDPI journal article supplement (doi:10.3390/pharmaceutics15051325), 2023-04-24
Supplement: s1 [file s1]

**Table S1.** Effects of [Ni(tcitr)<sub>2</sub>], [Pt(tcitr)<sub>2</sub>] and [Cu(tcitr)<sub>2</sub>] on the expression of RRM1. U937 cells were seeded (2 × 10<sup>6</sup> cells/flask) into 25 cm<sup>2</sup> flasks with complete medium and then treated with GI<sub>50</sub> value for each metal complexes for 1 – 4– 24 h. Total RNA was extracted, quantified and 1 µg was reverse-transcribed. The complementary DNA (cDNA) was used as a template of qRT-PCR reactions. Data are expressed as fold change ± standard deviation in target gene expression in treated cells normalized to the internal control gene (GAPDH) and relative to the DMSO negative control. Fold change values >2 mean an up regulation of the target gene; fold change values < 0.5 mean a down regulation of the target gene. Basal expression was defined by a fold change ranging from 0.5 to 1.9

| RRM1       | [Ni(tcitr) <sub>2</sub> ] | [Pt(tcitr) <sub>2</sub> ] | [Cu(tcitr) <sub>2</sub> ] |
|------------|---------------------------|---------------------------|---------------------------|
| <b>1h</b>  | 1.48 ± 0.02               | 0.61 ± 0.18               | 1.49 ± 0.09               |
| <b>4h</b>  | 0.65 ± 0.04               | 0.37 ± 0.05               | 1.61 ± 0.03               |
| <b>24h</b> | 1.16 ± 0.39               | 0.42 ± 0.04               | 0.68 ± 0.09               |

**Table S2.** Effects of [Ni(tcitr)<sub>2</sub>], [Pt(tcitr)<sub>2</sub>] and [Cu(tcitr)<sub>2</sub>] on the expression of RRM2. U937 cells were seeded ( $2 \times 10^6$  cells/flask) into 25 cm<sup>2</sup> flasks with complete medium and then treated with GI<sub>50</sub> value for each metal complexes for 1 – 4– 24 h. Total RNA was extracted, quantified and 1 µg was reverse-transcribed. The complementary DNA (cDNA) was used as a template of qRT-PCR reactions. Data are expressed as fold change  $\pm$  standard deviation in target gene expression in treated cells normalized to the internal control gene (GAPDH) and relative to the DMSO negative control. Fold change values  $>2$  mean an up regulation of the target gene; fold change values  $<0.5$  mean a down regulation of the target gene. Basal expression was defined by a fold change ranging from 0.5 to 1.9

| RRM2       | [Ni(tcitr) <sub>2</sub> ] | [Pt(tcitr) <sub>2</sub> ] | [Cu(tcitr) <sub>2</sub> ] |
|------------|---------------------------|---------------------------|---------------------------|
| <b>1h</b>  | 27.28 $\pm$ 2.45          | 0.61 $\pm$ 0.04           | 0.69 $\pm$ 0.08           |
| <b>4h</b>  | 18.07 $\pm$ 3.42          | 0.40 $\pm$ 0.03           | 0.65 $\pm$ 0.01           |
| <b>24h</b> | 246.64 $\pm$ 12.27        | 0.62 $\pm$ 0.04           | 1.16 $\pm$ 0.12           |

**Table S3.** Effects of [Ni(tcitr)<sub>2</sub>], [Pt(tcitr)<sub>2</sub>] and [Cu(tcitr)<sub>2</sub>] on the expression of p53R2. U937 cells were seeded (2 × 10<sup>6</sup> cells/flask) into 25 cm<sup>2</sup> flasks with complete medium and then treated with GI<sub>50</sub> value for each metal complexes for 1 – 4– 24 h. Total RNA was extracted, quantified and 1 µg was reverse-transcribed. The complementary DNA (cDNA) was used as a template of qRT-PCR reactions. Data are expressed as fold change ± standard deviation in target gene expression in treated cells normalized to the internal control gene (GAPDH) and relative to the DMSO negative control. Fold change values >2 mean an up regulation of the target gene; fold change values < 0.5 mean a down regulation of the target gene. Basal expression was defined by a fold change ranging from 0.5 to 1.9

| p53R2      | [Ni(tcitr) <sub>2</sub> ] | [Pt(tcitr) <sub>2</sub> ] | [Cu(tcitr) <sub>2</sub> ] |
|------------|---------------------------|---------------------------|---------------------------|
| <b>1h</b>  | 0.48 ± 0.01               | 0.26 ± 0.00               | 1.02 ± 0.06               |
| <b>4h</b>  | 0.41 ± 0.02               | 0.28 ± 0.02               | 1.09 ± 0.01               |
| <b>24h</b> | 0.94 ± 0.18               | 1.56 ± 0.15               | 1.25 ± 0.18               |

**Table S4.** Effects of [Ni(tcitr)<sub>2</sub>], [Pt(tcitr)<sub>2</sub>] and [Cu(tcitr)<sub>2</sub>] on the expression of ATM. U937 cells were seeded ( $2 \times 10^6$  cells/flask) into 25 cm<sup>2</sup> flasks with complete medium and then treated with GI<sub>50</sub> value for each metal complexes for 1 – 4– 24 h. Total RNA was extracted, quantified and 1 µg was reverse-transcribed. The complementary DNA (cDNA) was used as a template of qRT-PCR reactions. Data are expressed as fold change  $\pm$  standard deviation in target gene expression in treated cells normalized to the internal control gene (GAPDH) and relative to the DMSO negative control. Fold change values  $>2$  mean an up regulation of the target gene; fold change values  $<0.5$  mean a down regulation of the target gene. Basal expression was defined by a fold change ranging from 0.5 to 1.9

| ATM        | [Ni(tcitr) <sub>2</sub> ] | [Pt(tcitr) <sub>2</sub> ] | [Cu(tcitr) <sub>2</sub> ] |
|------------|---------------------------|---------------------------|---------------------------|
| <b>1h</b>  | 0.13 $\pm$ 0.01           | 1.19 $\pm$ 0.22           | 0.64 $\pm$ 0.07           |
| <b>4h</b>  | 1.55 $\pm$ 0.12           | 1.12 $\pm$ 0.36           | 0.13 $\pm$ 0.04           |
| <b>24h</b> | 0.83 $\pm$ 0.10           | 1.26 $\pm$ 0.23           | 1.89 $\pm$ 0.21           |

**Table S5.** Effects of [Ni(tcitr)<sub>2</sub>], [Pt(tcitr)<sub>2</sub>] and [Cu(tcitr)<sub>2</sub>] on the expression of Chk2. U937 cells were seeded ( $2 \times 10^6$  cells/flask) into 25 cm<sup>2</sup> flasks with complete medium and then treated with GI<sub>50</sub> value for each metal complexes for 1 – 4– 24 h. Total RNA was extracted, quantified and 1 µg was reverse-transcribed. The complementary DNA (cDNA) was used as a template of qRT-PCR reactions. Data are expressed as fold change  $\pm$  standard deviation in target gene expression in treated cells normalized to the internal control gene (GAPDH) and relative to the DMSO negative control. Fold change values >2 mean an up regulation of the target gene; fold change values < 0.5 mean a down regulation of the target gene. Basal expression was defined by a fold change ranging from 0.5 to 1.9

| Chk2       | [Ni(tcitr) <sub>2</sub> ] | [Pt(tcitr) <sub>2</sub> ] | [Cu(tcitr) <sub>2</sub> ] |
|------------|---------------------------|---------------------------|---------------------------|
| <b>1h</b>  | 15.62 $\pm$ 4.56          | 0.39 $\pm$ 0.25           | 0.11 $\pm$ 0.07           |
| <b>4h</b>  | 0.03 $\pm$ 0.00           | 0.55 $\pm$ 0.22           | 0.06 $\pm$ 0.03           |
| <b>24h</b> | 1.31 $\pm$ 0.05           | 5.5 $\pm$ 0.91            | 0.02 $\pm$ 0.00           |

**Table S6.** Effects of [Ni(tcitr)<sub>2</sub>], [Pt(tcitr)<sub>2</sub>] and [Cu(tcitr)<sub>2</sub>] on the expression of ATR. U937 cells were seeded (2 × 10<sup>6</sup> cells/flask) into 25 cm<sup>2</sup> flasks with complete medium and then treated with GI<sub>50</sub> value for each metal complexes for 1 – 4– 24 h. Total RNA was extracted, quantified and 1 µg was reverse-transcribed. The complementary DNA (cDNA) was used as a template of qRT-PCR reactions. Data are expressed as fold change ± standard deviation in target gene expression in treated cells normalized to the internal control gene (GAPDH) and relative to the DMSO negative control. Fold change values >2 mean an up regulation of the target gene; fold change values < 0.5 mean a down regulation of the target gene. Basal expression was defined by a fold change ranging from 0.5 to 1.9

| ATR        | [Ni(tcitr) <sub>2</sub> ] | [Pt(tcitr) <sub>2</sub> ] | [Cu(tcitr) <sub>2</sub> ] |
|------------|---------------------------|---------------------------|---------------------------|
| <b>1h</b>  | 0.20 ± 0.07               | 0.82 ± 0.07               | 0.45 ± 0.11               |
| <b>4h</b>  | 1.81 ± 0.32               | 0.94 ± 0.12               | 0.04 ± 0.01               |
| <b>24h</b> | 0.66 ± 0.15               | 1.45 ± 0.10               | 1.77 ± 0.15               |

**Table S7.** Effects of [Ni(tcitr)<sub>2</sub>], [Pt(tcitr)<sub>2</sub>] and [Cu(tcitr)<sub>2</sub>] on the expression of Chk1. U937 cells were seeded (2 × 10<sup>6</sup> cells/flask) into 25 cm<sup>2</sup> flasks with complete medium and then treated with GI<sub>50</sub> value for each metal complexes for 1 – 4– 24 h. Total RNA was extracted, quantified and 1 µg was reverse-transcribed. The complementary DNA (cDNA) was used as a template of qRT-PCR reactions. Data are expressed as fold change ± standard deviation in target gene expression in treated cells normalized to the internal control gene (GAPDH) and relative to the DMSO negative control. Fold change values >2 mean an up regulation of the target gene; fold change values < 0.5 mean a down regulation of the target gene. Basal expression was defined by a fold change ranging from 0.5 to 1.9

| Chk1       | [Ni(tcitr) <sub>2</sub> ] | [Pt(tcitr) <sub>2</sub> ] | [Cu(tcitr) <sub>2</sub> ] |
|------------|---------------------------|---------------------------|---------------------------|
| <b>1h</b>  | 1.22±0.08                 | 0.80±0.13                 | 0.07±0.01                 |
| <b>4h</b>  | 22.10±1.32                | 0.42±0.14                 | 0.05±0.01                 |
| <b>24h</b> | 1.14±0.13                 | 0.86±0.11                 | 9.14±1.29                 |

**Table S8.** Effects of [Ni(tcitr)<sub>2</sub>], [Pt(tcitr)<sub>2</sub>] and [Cu(tcitr)<sub>2</sub>] on the expression of Cyclin A1. U937 cells were seeded ( $2 \times 10^6$  cells/flask) into 25 cm<sup>2</sup> flasks with complete medium and then treated with GI<sub>50</sub> value for each metal complexes for 1 – 4– 24 h. Total RNA was extracted, quantified and 1 µg was reverse-transcribed. The complementary DNA (cDNA) was used as a template of qRT-PCR reactions. Data are expressed as fold change  $\pm$  standard deviation in target gene expression in treated cells normalized to the internal control gene (GAPDH) and relative to the DMSO negative control. Fold change values >2 mean an up regulation of the target gene; fold change values < 0.5 mean a down regulation of the target gene. Basal expression was defined by a fold change ranging from 0.5 to 1.9

| Cyclin A1  | [Ni(tcitr) <sub>2</sub> ] | [Pt(tcitr) <sub>2</sub> ] | [Cu(tcitr) <sub>2</sub> ] |
|------------|---------------------------|---------------------------|---------------------------|
| <b>1h</b>  | 0.91 $\pm$ 0.19           | 0.64 $\pm$ 0.07           | 0.50 $\pm$ 0.03           |
| <b>4h</b>  | 1.72 $\pm$ 0.54           | 0.40 $\pm$ 0.03           | 0.23 $\pm$ 0.01           |
| <b>24h</b> | 0.85 $\pm$ 0.16           | 5.97 $\pm$ 1.92           | 0.16 $\pm$ 0.07           |



**Table S9.** Effects of [Ni(tcitr)<sub>2</sub>], [Pt(tcitr)<sub>2</sub>] and [Cu(tcitr)<sub>2</sub>] on the expression of Cyclin B. U937 cells were seeded ( $2 \times 10^6$  cells/flask) into 25 cm<sup>2</sup> flasks with complete medium and then treated with GI<sub>50</sub> value for each metal complexes for 1 – 4– 24 h. Total RNA was extracted, quantified and 1 µg was reverse-transcribed. The complementary DNA (cDNA) was used as a template of qRT-PCR reactions. Data are expressed as fold change  $\pm$  standard deviation in target gene expression in treated cells normalized to the internal control gene (GAPDH) and relative to the DMSO negative control. Fold change values  $>2$  mean an up regulation of the target gene; fold change values  $<0.5$  mean a down regulation of the target gene. Basal expression was defined by a fold change ranging from 0.5 to 1.9

| Cyclin B   | [Ni(tcitr) <sub>2</sub> ] | [Pt(tcitr) <sub>2</sub> ] | [Cu(tcitr) <sub>2</sub> ] |
|------------|---------------------------|---------------------------|---------------------------|
| <b>1h</b>  | 1.37 $\pm$ 0.24           | 0.40 $\pm$ 0.01           | 0.38 $\pm$ 0.06           |
| <b>4h</b>  | 3.36 $\pm$ 0.78           | 0.24 $\pm$ 0.13           | 0.05 $\pm$ 0.00           |
| <b>24h</b> | 0.94 $\pm$ 0.06           | 0.71 $\pm$ 0.15           | 0.95 $\pm$ 0.02           |
